# Supplementary material
Source: publisher figshare collection journal article supplement (https://acs.figshare.com/ndownloader/files/4042789)
Supplement: Supplementary file 1 [file 4042789]

data_publication_text
_publ_requested_journal          J.Org.Chem.
_publ_contact_author_name        B.Sridhar
_publ_contact_author_address     
;Laboratory of X-ray Crystallography
CSIR-Indian Institute of Chemical Technology
Hyderabad- 500 007
India
;
_publ_contact_author_email       sshiya@yahoo.com
loop_
_publ_author_name
_publ_author_address
'Prashant Borkar'
;Natural Product Chemistry Division
CSIR-Indian Institute of Chemical Technology
Hyderabad- 500 007
India
;
'Venkateswarulu, A'
;Natural Product Chemistry Division
CSIR-Indian Institute of Chemical Technology
Hyderabad- 500 007
India
;
'Yadav, J. S.'
;Natural Product Chemistry Division
CSIR-Indian Institute of Chemical Technology
Hyderabad- 500 007
India
;
'Sridhar , B'
;Laboratory of X-ray Crystallography
CSIR-Indian Institute of Chemical Technology
Hyderabad- 500 007
India
;
'Subba Reddy, B.V.'
;Natural Product Chemistry Division
CSIR-Indian Institute of Chemical Technology
Hyderabad- 500 007
India
;

 
data_ao63 
 
_audit_creation_method            SHELXL-97 
_chemical_name_systematic 
; 
(3aS*,4R*,7aS*)-4-(naphthalen-1-yl)hexahydro-2H-thieno[3,2-c]thiopyran
; 
_chemical_name_common             ? 
_chemical_melting_point           ? 
_chemical_formula_moiety          'C17 H18 S2'  
_chemical_formula_sum 
 'C17 H18 S2' 
_chemical_formula_weight          286.43 
 
loop_ 
 _atom_type_symbol 
 _atom_type_description 
 _atom_type_scat_dispersion_real 
 _atom_type_scat_dispersion_imag 
 _atom_type_scat_source 
 'C'  'C'   0.0033   0.0016 
 'International Tables Vol C Tables 4.2.6.8 and 6.1.1.4' 
 'H'  'H'   0.0000   0.0000 
 'International Tables Vol C Tables 4.2.6.8 and 6.1.1.4' 
 'S'  'S'   0.1246   0.1234 
 'International Tables Vol C Tables 4.2.6.8 and 6.1.1.4' 
 
_symmetry_cell_setting            monoclinic
_symmetry_space_group_name_H-M    'P 21/c'
_symmetry_space_group_name_Hall   '-P 2ybc'
 
loop_ 
 _symmetry_equiv_pos_as_xyz 
 'x, y, z' 
 '-x, y+1/2, -z+1/2' 
 '-x, -y, -z' 
 'x, -y-1/2, z-1/2' 
 
_cell_length_a                    20.8483(16) 
_cell_length_b                    10.6900(8) 
_cell_length_c                    13.6039(11) 
_cell_angle_alpha                 90.00 
_cell_angle_beta                  107.394(1) 
_cell_angle_gamma                 90.00 
_cell_volume                      2893.2(4) 
_cell_formula_units_Z             8 
_cell_measurement_temperature     294(2) 
_cell_measurement_reflns_used     5167
_cell_measurement_theta_min       2.47
_cell_measurement_theta_max       27.03
 
_exptl_crystal_description        block
_exptl_crystal_colour             colorless
_exptl_crystal_size_max           0.16
_exptl_crystal_size_mid           0.14
_exptl_crystal_size_min           0.08
_exptl_crystal_density_meas       ? 
_exptl_crystal_density_diffrn     1.315 
_exptl_crystal_density_method     'not measured' 
_exptl_crystal_F_000              1216 
_exptl_absorpt_coefficient_mu     0.351 
_exptl_absorpt_correction_type    none
_exptl_absorpt_correction_T_min   ? 
_exptl_absorpt_correction_T_max   ? 
_exptl_absorpt_process_details    ? 
 
_exptl_special_details 
; 
 ? 
; 
 
_diffrn_ambient_temperature       294(2) 
_diffrn_radiation_wavelength      0.71073 
_diffrn_radiation_type            MoK\a 
_diffrn_radiation_source          'fine-focus sealed tube' 
_diffrn_radiation_monochromator   graphite 
_diffrn_measurement_device_type   'CCD Area Detector'
_diffrn_measurement_device        'Bruker SMART APEX CCD area-detector'
_diffrn_measurement_method        '\w scan' 
_diffrn_detector_area_resol_mean  ? 
_diffrn_standards_number          0 
_diffrn_standards_interval_count  ? 
_diffrn_standards_interval_time   ? 
_diffrn_standards_decay_%         ? 
_diffrn_reflns_number             27182 
_diffrn_reflns_av_R_equivalents   0.0220 
_diffrn_reflns_av_sigmaI/netI     0.0167 
_diffrn_reflns_limit_h_min        -24 
_diffrn_reflns_limit_h_max        24 
_diffrn_reflns_limit_k_min        -12 
_diffrn_reflns_limit_k_max        12 
_diffrn_reflns_limit_l_min        -16 
_diffrn_reflns_limit_l_max        16 
_diffrn_reflns_theta_min          2.05 
_diffrn_reflns_theta_max          25.00 
_reflns_number_total              5093 
_reflns_number_gt                 4256 
_reflns_threshold_expression      I>2\s(I) 
 
_computing_data_collection        'SMART (Bruker, 2001)'
_computing_cell_refinement        'SAINT (Bruker, 2001)'
_computing_data_reduction         'SAINT'
_computing_structure_solution     'SHELXS-97 (Sheldrick, 2008)' 
_computing_structure_refinement   'SHELXL-97 (Sheldrick, 2008)' 
_computing_molecular_graphics     'SHELXTL/PC (Sheldrick, 1990)'
_computing_publication_material   'SHELXL97' 
 
_refine_special_details 
; 
 Refinement of F^2^ against ALL reflections.  The weighted R-factor wR and 
 goodness of fit S are based on F^2^, conventional R-factors R are based 
 on F, with F set to zero for negative F^2^. The threshold expression of 
 F^2^ > 2sigma(F^2^) is used only for calculating R-factors(gt) etc. and is 
 not relevant to the choice of reflections for refinement.  R-factors based 
 on F^2^ are statistically about twice as large as those based on F, and R- 
 factors based on ALL data will be even larger. 
; 
 
_refine_ls_structure_factor_coef  Fsqd  
_refine_ls_matrix_type            full 
_refine_ls_weighting_scheme       calc  
_refine_ls_weighting_details 
 'calc w=1/[\s^2^(Fo^2^)+(0.0514P)^2^+0.7155P] where P=(Fo^2^+2Fc^2^)/3' 
_atom_sites_solution_primary      direct 
_atom_sites_solution_secondary    difmap 
_atom_sites_solution_hydrogens    geom 
_refine_ls_hydrogen_treatment     mixed 
_refine_ls_extinction_method      none 
_refine_ls_extinction_coef        ? 
_refine_ls_number_reflns          5093 
_refine_ls_number_parameters      343 
_refine_ls_number_restraints      0 
_refine_ls_R_factor_all           0.0433 
_refine_ls_R_factor_gt            0.0357 
_refine_ls_wR_factor_ref          0.1003 
_refine_ls_wR_factor_gt           0.0939 
_refine_ls_goodness_of_fit_ref    1.033 
_refine_ls_restrained_S_all       1.033 
_refine_ls_shift/su_max           0.000 
_refine_ls_shift/su_mean          0.000 
 
loop_ 
 _atom_site_label 
 _atom_site_type_symbol 
 _atom_site_fract_x 
 _atom_site_fract_y 
 _atom_site_fract_z 
 _atom_site_U_iso_or_equiv 
 _atom_site_adp_type 
 _atom_site_occupancy 
 _atom_site_symmetry_multiplicity 
 _atom_site_calc_flag 
 _atom_site_refinement_flags 
 _atom_site_disorder_assembly 
 _atom_site_disorder_group 
C1A C 0.55326(8) 0.15780(17) 0.37275(13) 0.0496(4) Uani 1 1 d . . . 
C2A C 0.58526(8) 0.26133(16) 0.43450(13) 0.0490(4) Uani 1 1 d . . . 
C3A C 0.55391(9) 0.33679(17) 0.49165(14) 0.0559(4) Uani 1 1 d . . . 
H3A H 0.5096 0.3206 0.4888 0.067 Uiso 1 1 calc R . . 
C4A C 0.58736(12) 0.4332(2) 0.55110(16) 0.0723(6) Uani 1 1 d . . . 
H4A H 0.5657 0.4813 0.5885 0.087 Uiso 1 1 calc R . . 
C5A C 0.65390(13) 0.4603(2) 0.55623(18) 0.0835(7) Uani 1 1 d . . . 
H5A H 0.6764 0.5258 0.5972 0.100 Uiso 1 1 calc R . . 
C6A C 0.68506(11) 0.3916(2) 0.50197(18) 0.0784(7) Uani 1 1 d . . . 
H6A H 0.7291 0.4114 0.5051 0.094 Uiso 1 1 calc R . . 
C7A C 0.65304(9) 0.2899(2) 0.44009(14) 0.0617(5) Uani 1 1 d . . . 
C8A C 0.68653(10) 0.2154(3) 0.38561(19) 0.0785(7) Uani 1 1 d . . . 
H8A H 0.7309 0.2332 0.3898 0.094 Uiso 1 1 calc R . . 
C9A C 0.65526(12) 0.1189(3) 0.32768(19) 0.0827(7) Uani 1 1 d . . . 
H9A H 0.6780 0.0708 0.2919 0.099 Uiso 1 1 calc R . . 
C10A C 0.58826(10) 0.0903(2) 0.32085(16) 0.0672(5) Uani 1 1 d . . . 
H10A H 0.5672 0.0237 0.2799 0.081 Uiso 1 1 calc R . . 
C11A C 0.48118(8) 0.12561(15) 0.36579(13) 0.0457(4) Uani 1 1 d . . . 
H11A H 0.4750 0.1482 0.4322 0.055 Uiso 1 1 calc R . . 
C12A C 0.38214(11) -0.03816(19) 0.36130(17) 0.0707(6) Uani 1 1 d . . . 
H12A H 0.3642 -0.1225 0.3548 0.085 Uiso 1 1 calc R . . 
H12B H 0.3839 -0.0073 0.4291 0.085 Uiso 1 1 calc R . . 
C13A C 0.33554(10) 0.04421(18) 0.28033(16) 0.0638(5) Uani 1 1 d . . . 
H13A H 0.2908 0.0400 0.2881 0.077 Uiso 1 1 calc R . . 
H13B H 0.3330 0.0117 0.2127 0.077 Uiso 1 1 calc R . . 
C14A C 0.35750(8) 0.18040(17) 0.28609(13) 0.0521(4) Uani 1 1 d . . . 
H14 H 0.3522 0.2180 0.3490 0.062 Uiso 1 1 calc R . . 
C15A C 0.36859(11) 0.2548(2) 0.10505(15) 0.0705(6) Uani 1 1 d . . . 
H15A H 0.3494 0.2115 0.0402 0.085 Uiso 1 1 calc R . . 
H15B H 0.3825 0.3376 0.0904 0.085 Uiso 1 1 calc R . . 
C16A C 0.42856(9) 0.18247(18) 0.17211(13) 0.0560(4) Uani 1 1 d . . . 
H16A H 0.4241 0.0942 0.1547 0.067 Uiso 1 1 calc R . . 
H16B H 0.4699 0.2132 0.1618 0.067 Uiso 1 1 calc R . . 
C17A C 0.42967(8) 0.20187(15) 0.28332(12) 0.0455(4) Uani 1 1 d . . . 
H17 H 0.4400 0.2903 0.2994 0.055 Uiso 1 1 calc R . . 
S1A S 0.46609(3) -0.04198(4) 0.34972(4) 0.06428(15) Uani 1 1 d . . . 
S2A S 0.30651(3) 0.26706(6) 0.17493(5) 0.07920(19) Uani 1 1 d . . . 
C1B C -0.03833(8) 0.14785(16) 0.34181(13) 0.0478(4) Uani 1 1 d . . . 
C2B C -0.07064(8) 0.25204(15) 0.37283(13) 0.0479(4) Uani 1 1 d . . . 
C3B C -0.04023(9) 0.32572(17) 0.46067(15) 0.0557(4) Uani 1 1 d . . . 
H3B H 0.0034 0.3073 0.5005 0.067 Uiso 1 1 calc R . . 
C4B C -0.07331(11) 0.42304(19) 0.48841(19) 0.0722(6) Uani 1 1 d . . . 
H4B H -0.0524 0.4691 0.5473 0.087 Uiso 1 1 calc R . . 
C5B C -0.13877(13) 0.4542(2) 0.4286(2) 0.0831(7) Uani 1 1 d . . . 
H5B H -0.1609 0.5217 0.4469 0.100 Uiso 1 1 calc R . . 
C6B C -0.16922(11) 0.3858(2) 0.3445(2) 0.0776(7) Uani 1 1 d . . . 
H6B H -0.2126 0.4069 0.3054 0.093 Uiso 1 1 calc R . . 
C7B C -0.13727(9) 0.28321(19) 0.31387(16) 0.0605(5) Uani 1 1 d . . . 
C8B C -0.17044(10) 0.2093(2) 0.22803(18) 0.0789(6) Uani 1 1 d . . . 
H8B H -0.2141 0.2291 0.1894 0.095 Uiso 1 1 calc R . . 
C9B C -0.13945(11) 0.1101(3) 0.20134(18) 0.0813(7) Uani 1 1 d . . . 
H9B H -0.1621 0.0613 0.1451 0.098 Uiso 1 1 calc R . . 
C10B C -0.07316(10) 0.0801(2) 0.25795(16) 0.0655(5) Uani 1 1 d . . . 
H10B H -0.0524 0.0120 0.2377 0.079 Uiso 1 1 calc R . . 
C11B C 0.03360(8) 0.11539(15) 0.40053(13) 0.0455(4) Uani 1 1 d . . . 
H11B H 0.0393 0.1329 0.4734 0.055 Uiso 1 1 calc R . . 
C12B C 0.13444(10) -0.05105(19) 0.47477(17) 0.0675(5) Uani 1 1 d . . . 
H12C H 0.1346 -0.0249 0.5431 0.081 Uiso 1 1 calc R . . 
H12D H 0.1523 -0.1354 0.4798 0.081 Uiso 1 1 calc R . . 
C13B C 0.17935(9) 0.03584(18) 0.43601(16) 0.0613(5) Uani 1 1 d . . . 
H13C H 0.1787 0.0099 0.3674 0.074 Uiso 1 1 calc R . . 
H13D H 0.2252 0.0284 0.4806 0.074 Uiso 1 1 calc R . . 
C14B C 0.15763(8) 0.17225(17) 0.43261(14) 0.0511(4) Uani 1 1 d . . . 
H14B H 0.1644 0.2020 0.5031 0.061 Uiso 1 1 calc R . . 
C15B C 0.14437(11) 0.2557(2) 0.24399(16) 0.0683(5) Uani 1 1 d . . . 
H15C H 0.1320 0.3380 0.2143 0.082 Uiso 1 1 calc R . . 
H15D H 0.1634 0.2085 0.1986 0.082 Uiso 1 1 calc R . . 
C16B C 0.08264(9) 0.18868(18) 0.25600(13) 0.0544(4) Uani 1 1 d . . . 
H16C H 0.0829 0.1017 0.2357 0.065 Uiso 1 1 calc R . . 
H16D H 0.0420 0.2276 0.2125 0.065 Uiso 1 1 calc R . . 
C17B C 0.08447(8) 0.19728(15) 0.36870(12) 0.0443(4) Uani 1 1 d . . . 
H17B H 0.0745 0.2843 0.3814 0.053 Uiso 1 1 calc R . . 
S1B S 0.04940(2) -0.05085(4) 0.39073(4) 0.06062(15) Uani 1 1 d . . . 
S2B S 0.20573(2) 0.27008(5) 0.37117(5) 0.07045(17) Uani 1 1 d . . . 
 
loop_ 
 _atom_site_aniso_label 
 _atom_site_aniso_U_11 
 _atom_site_aniso_U_22 
 _atom_site_aniso_U_33 
 _atom_site_aniso_U_23 
 _atom_site_aniso_U_13 
 _atom_site_aniso_U_12 
C1A 0.0448(9) 0.0564(10) 0.0454(9) 0.0060(8) 0.0100(7) 0.0012(8) 
C2A 0.0415(9) 0.0559(10) 0.0434(9) 0.0116(7) 0.0030(7) -0.0035(7) 
C3A 0.0536(10) 0.0562(11) 0.0519(10) 0.0021(8) 0.0064(8) -0.0064(8) 
C4A 0.0835(15) 0.0631(12) 0.0594(12) -0.0037(10) 0.0045(10) -0.0090(11) 
C5A 0.0854(16) 0.0771(15) 0.0657(14) 0.0060(12) -0.0114(12) -0.0331(13) 
C6A 0.0538(12) 0.0947(17) 0.0684(14) 0.0219(13) -0.0092(10) -0.0270(12) 
C7A 0.0430(9) 0.0797(13) 0.0545(11) 0.0219(10) 0.0023(8) -0.0051(9) 
C8A 0.0424(10) 0.1109(19) 0.0814(15) 0.0247(14) 0.0173(10) 0.0029(11) 
C9A 0.0658(14) 0.1043(19) 0.0864(16) 0.0084(14) 0.0358(12) 0.0185(13) 
C10A 0.0613(12) 0.0758(13) 0.0671(12) -0.0018(10) 0.0231(10) 0.0051(10) 
C11A 0.0464(9) 0.0457(9) 0.0432(9) -0.0016(7) 0.0108(7) -0.0053(7) 
C12A 0.0747(13) 0.0607(12) 0.0739(13) 0.0080(10) 0.0179(11) -0.0222(10) 
C13A 0.0530(10) 0.0690(12) 0.0668(12) -0.0010(10) 0.0138(9) -0.0201(9) 
C14A 0.0432(9) 0.0601(11) 0.0512(10) 0.0005(8) 0.0113(7) -0.0058(8) 
C15A 0.0713(13) 0.0810(14) 0.0509(11) 0.0109(10) 0.0053(10) -0.0075(11) 
C16A 0.0546(10) 0.0648(11) 0.0480(10) 0.0031(8) 0.0144(8) -0.0069(9) 
C17A 0.0429(8) 0.0440(9) 0.0475(9) -0.0015(7) 0.0105(7) -0.0068(7) 
S1A 0.0696(3) 0.0465(3) 0.0712(3) 0.0037(2) 0.0127(2) -0.0029(2) 
S2A 0.0501(3) 0.0967(4) 0.0823(4) 0.0234(3) 0.0068(3) 0.0066(3) 
C1B 0.0387(8) 0.0544(10) 0.0503(10) 0.0039(8) 0.0135(7) -0.0028(7) 
C2B 0.0389(8) 0.0512(10) 0.0561(10) 0.0129(8) 0.0179(7) -0.0011(7) 
C3B 0.0500(10) 0.0540(10) 0.0678(12) 0.0026(9) 0.0247(9) -0.0012(8) 
C4B 0.0782(14) 0.0556(11) 0.0975(16) -0.0040(11) 0.0488(13) -0.0032(10) 
C5B 0.0824(16) 0.0582(13) 0.131(2) 0.0192(14) 0.0665(17) 0.0189(11) 
C6B 0.0548(12) 0.0783(15) 0.1082(19) 0.0373(14) 0.0373(12) 0.0225(11) 
C7B 0.0404(9) 0.0701(12) 0.0731(13) 0.0238(10) 0.0201(9) 0.0049(9) 
C8B 0.0414(10) 0.1083(18) 0.0762(15) 0.0183(14) 0.0012(10) 0.0025(11) 
C9B 0.0544(12) 0.1081(19) 0.0680(14) -0.0083(13) -0.0022(10) -0.0124(12) 
C10B 0.0517(10) 0.0772(13) 0.0627(12) -0.0092(10) 0.0098(9) -0.0026(9) 
C11B 0.0416(8) 0.0492(9) 0.0460(9) -0.0002(7) 0.0134(7) 0.0025(7) 
C12B 0.0590(11) 0.0631(12) 0.0796(14) 0.0218(10) 0.0198(10) 0.0150(9) 
C13B 0.0432(9) 0.0679(12) 0.0708(12) 0.0121(10) 0.0140(9) 0.0122(8) 
C14B 0.0393(8) 0.0610(11) 0.0511(10) 0.0003(8) 0.0105(7) -0.0009(8) 
C15B 0.0682(13) 0.0749(13) 0.0688(13) 0.0087(10) 0.0314(11) -0.0044(10) 
C16B 0.0492(10) 0.0633(11) 0.0495(10) 0.0069(8) 0.0129(8) 0.0007(8) 
C17B 0.0381(8) 0.0430(8) 0.0506(9) -0.0002(7) 0.0115(7) 0.0023(7) 
S1B 0.0558(3) 0.0475(3) 0.0795(3) 0.0068(2) 0.0216(2) 0.0003(2) 
S2B 0.0462(3) 0.0761(3) 0.0885(4) 0.0083(3) 0.0193(3) -0.0117(2) 
 
_geom_special_details 
; 
 All esds (except the esd in the dihedral angle between two l.s. planes) 
 are estimated using the full covariance matrix.  The cell esds are taken 
 into account individually in the estimation of esds in distances, angles 
 and torsion angles; correlations between esds in cell parameters are only 
 used when they are defined by crystal symmetry.  An approximate (isotropic) 
 treatment of cell esds is used for estimating esds involving l.s. planes. 
; 
 
loop_ 
 _geom_bond_atom_site_label_1 
 _geom_bond_atom_site_label_2 
 _geom_bond_distance 
 _geom_bond_site_symmetry_2 
 _geom_bond_publ_flag 
C1A C10A 1.364(3) . ? 
C1A C2A 1.428(2) . ? 
C1A C11A 1.517(2) . ? 
C2A C3A 1.409(3) . ? 
C2A C7A 1.426(2) . ? 
C3A C4A 1.366(3) . ? 
C3A H3A 0.9300 . ? 
C4A C5A 1.398(3) . ? 
C4A H4A 0.9300 . ? 
C5A C6A 1.339(3) . ? 
C5A H5A 0.9300 . ? 
C6A C7A 1.414(3) . ? 
C6A H6A 0.9300 . ? 
C7A C8A 1.408(3) . ? 
C8A C9A 1.342(3) . ? 
C8A H8A 0.9300 . ? 
C9A C10A 1.405(3) . ? 
C9A H9A 0.9300 . ? 
C10A H10A 0.9300 . ? 
C11A C17A 1.535(2) . ? 
C11A S1A 1.8208(17) . ? 
C11A H11A 0.9800 . ? 
C12A C13A 1.514(3) . ? 
C12A S1A 1.804(2) . ? 
C12A H12A 0.9700 . ? 
C12A H12B 0.9700 . ? 
C13A C14A 1.521(2) . ? 
C13A H13A 0.9700 . ? 
C13A H13B 0.9700 . ? 
C14A C17A 1.534(2) . ? 
C14A S2A 1.8204(18) . ? 
C14A H14 0.9800 . ? 
C15A C16A 1.521(3) . ? 
C15A S2A 1.825(2) . ? 
C15A H15A 0.9700 . ? 
C15A H15B 0.9700 . ? 
C16A C17A 1.520(2) . ? 
C16A H16A 0.9700 . ? 
C16A H16B 0.9700 . ? 
C17A H17 0.9800 . ? 
C1B C10B 1.363(3) . ? 
C1B C2B 1.429(2) . ? 
C1B C11B 1.514(2) . ? 
C2B C3B 1.413(3) . ? 
C2B C7B 1.421(2) . ? 
C3B C4B 1.362(3) . ? 
C3B H3B 0.9300 . ? 
C4B C5B 1.404(3) . ? 
C4B H4B 0.9300 . ? 
C5B C6B 1.347(4) . ? 
C5B H5B 0.9300 . ? 
C6B C7B 1.409(3) . ? 
C6B H6B 0.9300 . ? 
C7B C8B 1.408(3) . ? 
C8B C9B 1.346(3) . ? 
C8B H8B 0.9300 . ? 
C9B C10B 1.404(3) . ? 
C9B H9B 0.9300 . ? 
C10B H10B 0.9300 . ? 
C11B C17B 1.534(2) . ? 
C11B S1B 1.8196(17) . ? 
C11B H11B 0.9800 . ? 
C12B C13B 1.521(3) . ? 
C12B S1B 1.800(2) . ? 
C12B H12C 0.9700 . ? 
C12B H12D 0.9700 . ? 
C13B C14B 1.523(3) . ? 
C13B H13C 0.9700 . ? 
C13B H13D 0.9700 . ? 
C14B C17B 1.537(2) . ? 
C14B S2B 1.8163(18) . ? 
C14B H14B 0.9800 . ? 
C15B C16B 1.524(3) . ? 
C15B S2B 1.825(2) . ? 
C15B H15C 0.9700 . ? 
C15B H15D 0.9700 . ? 
C16B C17B 1.525(2) . ? 
C16B H16C 0.9700 . ? 
C16B H16D 0.9700 . ? 
C17B H17B 0.9800 . ? 
 
loop_ 
 _geom_angle_atom_site_label_1 
 _geom_angle_atom_site_label_2 
 _geom_angle_atom_site_label_3 
 _geom_angle 
 _geom_angle_site_symmetry_1 
 _geom_angle_site_symmetry_3 
 _geom_angle_publ_flag 
C10A C1A C2A 119.09(17) . . ? 
C10A C1A C11A 121.42(17) . . ? 
C2A C1A C11A 119.49(15) . . ? 
C3A C2A C7A 117.62(17) . . ? 
C3A C2A C1A 123.77(15) . . ? 
C7A C2A C1A 118.60(17) . . ? 
C4A C3A C2A 121.31(19) . . ? 
C4A C3A H3A 119.3 . . ? 
C2A C3A H3A 119.3 . . ? 
C3A C4A C5A 120.6(2) . . ? 
C3A C4A H4A 119.7 . . ? 
C5A C4A H4A 119.7 . . ? 
C6A C5A C4A 119.8(2) . . ? 
C6A C5A H5A 120.1 . . ? 
C4A C5A H5A 120.1 . . ? 
C5A C6A C7A 122.0(2) . . ? 
C5A C6A H6A 119.0 . . ? 
C7A C6A H6A 119.0 . . ? 
C8A C7A C6A 121.9(2) . . ? 
C8A C7A C2A 119.36(19) . . ? 
C6A C7A C2A 118.7(2) . . ? 
C9A C8A C7A 120.9(2) . . ? 
C9A C8A H8A 119.5 . . ? 
C7A C8A H8A 119.5 . . ? 
C8A C9A C10A 120.3(2) . . ? 
C8A C9A H9A 119.9 . . ? 
C10A C9A H9A 119.9 . . ? 
C1A C10A C9A 121.7(2) . . ? 
C1A C10A H10A 119.1 . . ? 
C9A C10A H10A 119.1 . . ? 
C1A C11A C17A 112.88(13) . . ? 
C1A C11A S1A 111.29(12) . . ? 
C17A C11A S1A 112.14(11) . . ? 
C1A C11A H11A 106.7 . . ? 
C17A C11A H11A 106.7 . . ? 
S1A C11A H11A 106.7 . . ? 
C13A C12A S1A 112.20(14) . . ? 
C13A C12A H12A 109.2 . . ? 
S1A C12A H12A 109.2 . . ? 
C13A C12A H12B 109.2 . . ? 
S1A C12A H12B 109.2 . . ? 
H12A C12A H12B 107.9 . . ? 
C12A C13A C14A 113.67(15) . . ? 
C12A C13A H13A 108.8 . . ? 
C14A C13A H13A 108.8 . . ? 
C12A C13A H13B 108.8 . . ? 
C14A C13A H13B 108.8 . . ? 
H13A C13A H13B 107.7 . . ? 
C13A C14A C17A 115.11(15) . . ? 
C13A C14A S2A 110.62(12) . . ? 
C17A C14A S2A 103.71(11) . . ? 
C13A C14A H14 109.1 . . ? 
C17A C14A H14 109.1 . . ? 
S2A C14A H14 109.1 . . ? 
C16A C15A S2A 107.93(13) . . ? 
C16A C15A H15A 110.1 . . ? 
S2A C15A H15A 110.1 . . ? 
C16A C15A H15B 110.1 . . ? 
S2A C15A H15B 110.1 . . ? 
H15A C15A H15B 108.4 . . ? 
C17A C16A C15A 107.03(16) . . ? 
C17A C16A H16A 110.3 . . ? 
C15A C16A H16A 110.3 . . ? 
C17A C16A H16B 110.3 . . ? 
C15A C16A H16B 110.3 . . ? 
H16A C16A H16B 108.6 . . ? 
C16A C17A C14A 106.31(13) . . ? 
C16A C17A C11A 117.01(14) . . ? 
C14A C17A C11A 112.32(13) . . ? 
C16A C17A H17 106.9 . . ? 
C14A C17A H17 106.9 . . ? 
C11A C17A H17 106.9 . . ? 
C12A S1A C11A 96.00(9) . . ? 
C14A S2A C15A 93.87(9) . . ? 
C10B C1B C2B 118.76(16) . . ? 
C10B C1B C11B 121.04(16) . . ? 
C2B C1B C11B 120.19(15) . . ? 
C3B C2B C7B 117.54(17) . . ? 
C3B C2B C1B 123.51(15) . . ? 
C7B C2B C1B 118.93(17) . . ? 
C4B C3B C2B 121.57(19) . . ? 
C4B C3B H3B 119.2 . . ? 
C2B C3B H3B 119.2 . . ? 
C3B C4B C5B 120.4(2) . . ? 
C3B C4B H4B 119.8 . . ? 
C5B C4B H4B 119.8 . . ? 
C6B C5B C4B 119.5(2) . . ? 
C6B C5B H5B 120.2 . . ? 
C4B C5B H5B 120.2 . . ? 
C5B C6B C7B 122.0(2) . . ? 
C5B C6B H6B 119.0 . . ? 
C7B C6B H6B 119.0 . . ? 
C8B C7B C6B 121.6(2) . . ? 
C8B C7B C2B 119.43(19) . . ? 
C6B C7B C2B 119.0(2) . . ? 
C9B C8B C7B 120.60(19) . . ? 
C9B C8B H8B 119.7 . . ? 
C7B C8B H8B 119.7 . . ? 
C8B C9B C10B 120.4(2) . . ? 
C8B C9B H9B 119.8 . . ? 
C10B C9B H9B 119.8 . . ? 
C1B C10B C9B 121.9(2) . . ? 
C1B C10B H10B 119.1 . . ? 
C9B C10B H10B 119.1 . . ? 
C1B C11B C17B 112.32(13) . . ? 
C1B C11B S1B 110.96(12) . . ? 
C17B C11B S1B 112.40(11) . . ? 
C1B C11B H11B 106.9 . . ? 
C17B C11B H11B 106.9 . . ? 
S1B C11B H11B 106.9 . . ? 
C13B C12B S1B 111.76(14) . . ? 
C13B C12B H12C 109.3 . . ? 
S1B C12B H12C 109.3 . . ? 
C13B C12B H12D 109.3 . . ? 
S1B C12B H12D 109.3 . . ? 
H12C C12B H12D 107.9 . . ? 
C12B C13B C14B 112.76(15) . . ? 
C12B C13B H13C 109.0 . . ? 
C14B C13B H13C 109.0 . . ? 
C12B C13B H13D 109.0 . . ? 
C14B C13B H13D 109.0 . . ? 
H13C C13B H13D 107.8 . . ? 
C13B C14B C17B 114.81(14) . . ? 
C13B C14B S2B 111.42(12) . . ? 
C17B C14B S2B 103.33(11) . . ? 
C13B C14B H14B 109.0 . . ? 
C17B C14B H14B 109.0 . . ? 
S2B C14B H14B 109.0 . . ? 
C16B C15B S2B 108.24(13) . . ? 
C16B C15B H15C 110.1 . . ? 
S2B C15B H15C 110.1 . . ? 
C16B C15B H15D 110.1 . . ? 
S2B C15B H15D 110.1 . . ? 
H15C C15B H15D 108.4 . . ? 
C15B C16B C17B 108.13(15) . . ? 
C15B C16B H16C 110.1 . . ? 
C17B C16B H16C 110.1 . . ? 
C15B C16B H16D 110.1 . . ? 
C17B C16B H16D 110.1 . . ? 
H16C C16B H16D 108.4 . . ? 
C16B C17B C11B 115.96(14) . . ? 
C16B C17B C14B 106.30(13) . . ? 
C11B C17B C14B 113.20(13) . . ? 
C16B C17B H17B 107.0 . . ? 
C11B C17B H17B 107.0 . . ? 
C14B C17B H17B 107.0 . . ? 
C12B S1B C11B 96.90(9) . . ? 
C14B S2B C15B 93.49(8) . . ? 
 
loop_ 
 _geom_torsion_atom_site_label_1 
 _geom_torsion_atom_site_label_2 
 _geom_torsion_atom_site_label_3 
 _geom_torsion_atom_site_label_4 
 _geom_torsion 
 _geom_torsion_site_symmetry_1 
 _geom_torsion_site_symmetry_2 
 _geom_torsion_site_symmetry_3 
 _geom_torsion_site_symmetry_4 
 _geom_torsion_publ_flag 
C10A C1A C2A C3A -179.65(17) . . . . ? 
C11A C1A C2A C3A 0.7(2) . . . . ? 
C10A C1A C2A C7A -0.4(2) . . . . ? 
C11A C1A C2A C7A 179.94(15) . . . . ? 
C7A C2A C3A C4A -0.6(3) . . . . ? 
C1A C2A C3A C4A 178.67(17) . . . . ? 
C2A C3A C4A C5A 0.5(3) . . . . ? 
C3A C4A C5A C6A 0.4(3) . . . . ? 
C4A C5A C6A C7A -1.1(3) . . . . ? 
C5A C6A C7A C8A -178.0(2) . . . . ? 
C5A C6A C7A C2A 0.9(3) . . . . ? 
C3A C2A C7A C8A 178.86(17) . . . . ? 
C1A C2A C7A C8A -0.5(3) . . . . ? 
C3A C2A C7A C6A -0.1(2) . . . . ? 
C1A C2A C7A C6A -179.39(16) . . . . ? 
C6A C7A C8A C9A 179.7(2) . . . . ? 
C2A C7A C8A C9A 0.8(3) . . . . ? 
C7A C8A C9A C10A -0.3(4) . . . . ? 
C2A C1A C10A C9A 0.9(3) . . . . ? 
C11A C1A C10A C9A -179.40(18) . . . . ? 
C8A C9A C10A C1A -0.6(4) . . . . ? 
C10A C1A C11A C17A -94.8(2) . . . . ? 
C2A C1A C11A C17A 84.90(18) . . . . ? 
C10A C1A C11A S1A 32.3(2) . . . . ? 
C2A C1A C11A S1A -147.99(13) . . . . ? 
S1A C12A C13A C14A -61.1(2) . . . . ? 
C12A C13A C14A C17A 54.1(2) . . . . ? 
C12A C13A C14A S2A 171.24(15) . . . . ? 
S2A C15A C16A C17A -26.25(19) . . . . ? 
C15A C16A C17A C14A 46.81(19) . . . . ? 
C15A C16A C17A C11A 173.19(15) . . . . ? 
C13A C14A C17A C16A 75.62(19) . . . . ? 
S2A C14A C17A C16A -45.36(16) . . . . ? 
C13A C14A C17A C11A -53.5(2) . . . . ? 
S2A C14A C17A C11A -174.52(11) . . . . ? 
C1A C11A C17A C16A 63.73(19) . . . . ? 
S1A C11A C17A C16A -62.93(17) . . . . ? 
C1A C11A C17A C14A -172.91(14) . . . . ? 
S1A C11A C17A C14A 60.43(16) . . . . ? 
C13A C12A S1A C11A 59.01(16) . . . . ? 
C1A C11A S1A C12A 173.35(13) . . . . ? 
C17A C11A S1A C12A -59.14(13) . . . . ? 
C13A C14A S2A C15A -98.02(15) . . . . ? 
C17A C14A S2A C15A 25.93(13) . . . . ? 
C16A C15A S2A C14A -0.22(15) . . . . ? 
C10B C1B C2B C3B 177.53(17) . . . . ? 
C11B C1B C2B C3B -3.4(2) . . . . ? 
C10B C1B C2B C7B -1.5(2) . . . . ? 
C11B C1B C2B C7B 177.58(15) . . . . ? 
C7B C2B C3B C4B 0.1(3) . . . . ? 
C1B C2B C3B C4B -178.89(17) . . . . ? 
C2B C3B C4B C5B -1.2(3) . . . . ? 
C3B C4B C5B C6B 1.2(3) . . . . ? 
C4B C5B C6B C7B -0.2(3) . . . . ? 
C5B C6B C7B C8B 177.6(2) . . . . ? 
C5B C6B C7B C2B -0.8(3) . . . . ? 
C3B C2B C7B C8B -177.55(17) . . . . ? 
C1B C2B C7B C8B 1.5(3) . . . . ? 
C3B C2B C7B C6B 0.8(2) . . . . ? 
C1B C2B C7B C6B 179.90(16) . . . . ? 
C6B C7B C8B C9B -178.7(2) . . . . ? 
C2B C7B C8B C9B -0.3(3) . . . . ? 
C7B C8B C9B C10B -0.9(4) . . . . ? 
C2B C1B C10B C9B 0.3(3) . . . . ? 
C11B C1B C10B C9B -178.78(19) . . . . ? 
C8B C9B C10B C1B 1.0(4) . . . . ? 
C10B C1B C11B C17B 98.1(2) . . . . ? 
C2B C1B C11B C17B -80.96(19) . . . . ? 
C10B C1B C11B S1B -28.7(2) . . . . ? 
C2B C1B C11B S1B 152.29(13) . . . . ? 
S1B C12B C13B C14B 62.8(2) . . . . ? 
C12B C13B C14B C17B -55.9(2) . . . . ? 
C12B C13B C14B S2B -172.87(14) . . . . ? 
S2B C15B C16B C17B 18.59(19) . . . . ? 
C15B C16B C17B C11B -169.34(15) . . . . ? 
C15B C16B C17B C14B -42.55(19) . . . . ? 
C1B C11B C17B C16B -60.77(19) . . . . ? 
S1B C11B C17B C16B 65.20(17) . . . . ? 
C1B C11B C17B C14B 175.97(14) . . . . ? 
S1B C11B C17B C14B -58.05(17) . . . . ? 
C13B C14B C17B C16B -74.89(18) . . . . ? 
S2B C14B C17B C16B 46.64(15) . . . . ? 
C13B C14B C17B C11B 53.5(2) . . . . ? 
S2B C14B C17B C11B 175.07(11) . . . . ? 
C13B C12B S1B C11B -59.21(16) . . . . ? 
C1B C11B S1B C12B -176.21(12) . . . . ? 
C17B C11B S1B C12B 57.08(13) . . . . ? 
C13B C14B S2B C15B 92.70(14) . . . . ? 
C17B C14B S2B C15B -31.09(13) . . . . ? 
C16B C15B S2B C14B 7.76(15) . . . . ? 
 
_diffrn_measured_fraction_theta_max    1.000 
_diffrn_reflns_theta_full              25.00 
_diffrn_measured_fraction_theta_full   1.000 
_refine_diff_density_max    0.264 
_refine_diff_density_min   -0.158 
_refine_diff_density_rms    0.034 
